# Fractal model of emergence of a proto-plant

V.V. Galitskii

Institute of Physical-Chemical and Biological Problems of Soil Science RAS  
Pushchino, Moscow region, Russia

ABSTRACT Sectional model of the tree's system branches, which was published earlier, was extended in the range (0,1) for model's allometric parameter  $\mu$ , binding magnitude of the green biomass of a tree and its size (for spruce  $\mu \approx 1.83$ ). The model has shown presence of a biomass of branches in this range that indicates, according to fractal geometry, on the placement of a green biomass in the form of set of "points". In turn according to contemporary notions about endosymbiotic character of appearance of organelles in eukaryotic cell this was interpreted as begin of endosymbiosis of cyanobacteria and a host (protist) and has been modeled by the groups placement of growing number of points on an interval under initial limitation the number of points per group. The limitation is connected to the initial absence in protist an infrastructure which is need for the growing number of cyanobacteria. It has been demonstrated that initially in course of increasing total number of points the parameter  $\mu$  decreases from 1.0 to 0.25 under the fixed number of points per group and then increases to 1.0 under the fixed number of groups. This gives an initial deceleration of growth of proto-plant's size (a characteristic geometrical size of the point set) and then the exponential growth after deliverance from limitation of point number per group in course of host evolution. Similar initial deceleration of growth can be seen now also in higher plants. Morphological analogy of situations of beginning the plant embryogenesis and of seed germination with the situation described by the model of proto-plant appearance is discussed.

**Keywords:** sectional model of a tree, fractal parameter, set of photosynthetic points, group placement, endosymbiosis, trajectory of evolution, proto-plant, initial deceleration of growth.

## INTRODUCTION

In [1] has been allocated the sectional tree structure with periodic growth, which can be described by a simple model of the dynamics biomass of section using the notion of co-axial adjacent virtual trees, nested each to other and periodically appearing on the top of the tree. Biomass of each next virtual tree is part of previous one and accordingly, the biomass of each section consisting of biomasses of its branches, may be calculated as the difference between biomasses the two adjacent virtual trees. Considering the dynamics of real tree biomass known and taking it for the virtual tree as

32 an initial approximation, we can thus obtain the dynamics of biomass distribution along sections (and  
33 height) of the real tree [1]. When using the assumption that the dynamics of the green biomass of a tree  
34 is monotonic and limited, model of the dynamics of green tree biomass showed both a series of  
35 properties that have analogs in reality, and the possibility of obtaining by varying the three model  
36 parameters series of biomass distributions in height (sections) of the tree that may be associated with a  
37 rather distant from each other tree species [2]. The model has been used as a basis for analyzing the  
38 dynamics of distribution and distant transport of assimilates along the freely growing tree using  
39 "diffusion" formulation of transport mechanism of mass-flow. Model has shown the possibility of the  
40 so-called "a respiratory barrier" associated with the power-law dependence of costs on the breath on  
41 the magnitude of biomass, as well as the effect of the stratification of the sections by interleaving  
42 groups of the donors and acceptors [3]. Combining the sectional model and the two-dimensional model  
43 of the tree biomass dynamics that grows not freely [4], has demonstrated that the lower sections of a  
44 tree growing in a limited area in the community are in oppression and die (more rapidly in comparison  
45 with the freely growing tree). As a result, at the top of the tree new sections appear and they are  
46 growing freely, and the bottom sections are dieing off, i.e. occurs wave of biomass, that moves up  
47 along the tree stem [5].

48 In [6] the sectional tree model was extended to the branches system that is green biomass  
49 respective sections of tree. Parametrizing model of branches system using nature data [7] about  
50 lifespan  $t_{D,j}$  of spruce branches of four orders ( $j = 1, \dots, 4$ ) showed that in this case model of system of  
51 regular branches must also take into consideration two known features of spruce □ initial growth  
52 deceleration [8] and existence and role of inter-verticil branches [9, 10]. The combined model is in  
53 good agreement with natural data and with other publications. Model only regular branches showed  
54 only the branches of the 1st order, and when it is complemented by sub-model of the initial  
55 deceleration of growth it shows the branches of all 4 orders [6, fig. 2A-g]. This article discusses some  
56 of the consequences of interpretation of the allometric parameter  $\mu$  linking green biomass  $B$  and  
57 geometric size  $H$  of a tree

$$58 \quad B \sim H^\mu \quad (1)$$

59 as a fractal parameter, and dissemination of model to the range  $\mu (0, 1)$ . For spruce the value of  
60 parameter was obtained  $\mu \approx 1.83$  [6]. It lies in the range  $[1, 2)$  corresponding to a set of linear elements  
61 (conifer needles) [11].

62 Figure 1 shows dependence  $t_{D,j}(\mu)$  of lifespan for system of the  $j$ -orders branches. It shows features  
63 of the model system of regular branches, which was augmented by the sub-model of initial growth  
64 deceleration for the range of fractal parameter  $\mu (0, 1)$  with the set of other parameters of spruce from

65 [7, 12]. This range according to the ideas of fractal geometry [11] corresponds to the set of points. In  
 66 this range of  $\mu$  there are the branches of first 3 orders, i.e. biomass is placed along height of "tree" in  
 67 the form of green "dots" what is not observed visually in the higher plants. The article [12]  
 68 demonstrated that the appearance of branches of orders  $j = 1, 2$  and 3 in this range of  $\mu$  is a  
 69 consequence of accounting initial deceleration in growth model.

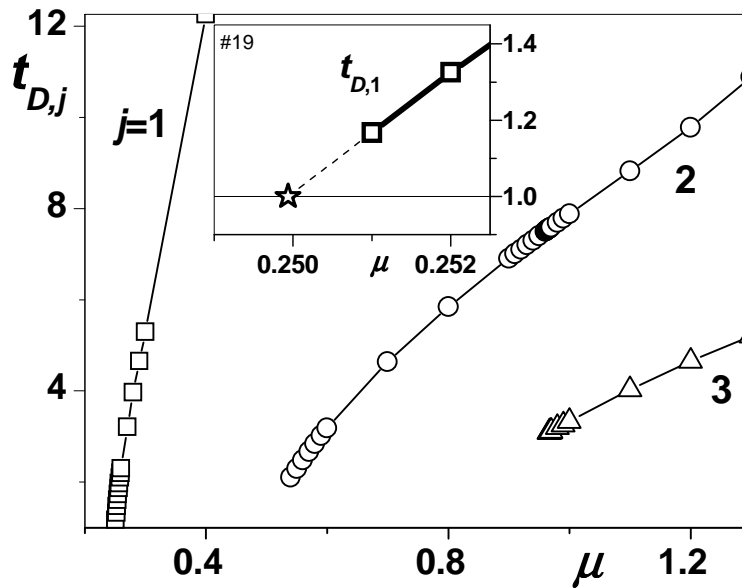

70  
 71 Fig. 1. The dependence of the lifetime of the  $j$ -branches  $t_{D,j}$  of regular branches' model with adding of the sub-model  
 72 of initial growth deceleration [6]; other parameters are as for spruce [6, 7]. Inset for the 1-branch in a larger scale, an  
 73 asterisk  $\square$  the appearance of the 1-branch for parameter set  $\mu\#19$  [6].

#### 74 ON THE FRACTAL PROPERTIES OF SETS OF POINTS ON THE INTERVAL

75 The mechanisms of photosynthesis of higher plants and cyanobacteria are practically identical. This  
 76 is due to the history of the appearance of plants in symbiosis and / or endosymbiosis of cyanobacteria  
 77 and protists. According to [13-15], chloroplasts of modern plants are the descendants of the  
 78 cyanobacteria which undergone transformation in the course of evolution after the organization of  
 79 endosymbiosis with protists. Thus, photosynthesis in plants and is now being performed by "point"  
 80 elements (chloroplasts), placed in the cells of green biomass of plants [15, 16]. Features of placing a  
 81 set of points in space affect the value of a fractal parameter and thus the efficiency of using of sunlight  
 82 in the plant growth. It should be noted that a tree and set of points are natural objects of the fractal  
 83 geometry, which allows using its methods directly [11].

84 Assuming that the initial invasions of cyanobacteria into the cell of endosymbiosis' host were  
 85 sporadic and have not lead directly to a compact placement and considering that protists are by several

86 orders bigger than cyanobacteria, we can estimate the parameter  $\mu$  for the set of  $N_p$  points in an interval  
87 using the usual algorithm of box counting [11]. Placing points of a set not in the groups of points on an  
88 interval but with uniform random placement or with placement with fixed step leads to  $\mu \approx 1.0$ .  
89 Placement in groups of points on the interval gives  $\mu < 1$ . It can be noticed that Cantor point sets,  
90 which often considered as a simple example [11], are actually group placements with  $\mu < 1$ .

91 For group placements of points on the interval [12]: 1) the value  $\mu$  is practically independent of  $A$  □  
92 relative value of on-off space ratio for stepper placement of groups; 2)  $\mu$  depends on type of the  
93 placement of points in the groups; 3) for stepper placement of groups the value  $\mu$  quite resistant to  
94 accidental and rather large location deviations of groups.

## 95 **FRACTAL TRAJECTORIES OF PROTO-PLANT EVOLUTION**

96 Endosymbiosis is cohabitation of protist and cyanobacteria within it, as a natural development of  
97 their symbiosis during the trophic relations between "heterotrophic protists" and "photosynthetic  
98 prokaryotes" [13: 25]. Thus cyanobacteria, being in the capsule, the inner wall of which has the same  
99 properties as the outer wall of the host, appeared in natural conditions close to them in symbiosis and  
100 in result continued normal existence in endosymbiosis [17]. Endosymbiosis begins with a minimal  
101 number of cyanobacteria inside the host –  $N_p = N_g * n_g$  and in groups –  $n_g$  ( $N_g$  is the number of groups).  
102 This is determined by the initial lack in host of a necessary system for supplying cyanobacteria and  
103 distribution of their products (i.e. an infrastructure). The number of groups  $N_g$ , seems less critical,  
104 since supplying them in this case is local and may be carried out at symbiotic level. During evolution  
105 of endosymbiosis, the number of groups  $N_g$  containing 1 and / or 2 dots should increase at first and  
106 then upon reaching a certain level of supplying (infrastructure) cyanobacteria may start to change  
107 (grow)  $n_g$ . Fig. 2 shows the dependence of  $\mu(N_g)$  (empty symbols) for some fixed values of  $n_g$ . The  
108 parameter  $\mu$  decreases from 1 to  $\approx 0.25$  with the growing number (from 1) of groups  $N_g$  and a  
109 minimum fixed number ( $n_g = 2$ ) of points per group. The same figure shows the dependence of  $\mu(n_g)$   
110 with increasing  $n_g$  for several fixed values  $N_g$  (black symbols). The parameter  $\mu$  increases weakly  
111 with the number of points in the group  $n_g$  at a small fixed number of groups  $N_g (\geq 2)$ . When  $N_g$  value  
112 is large then the parameter  $\mu$  increases at first rapidly with  $n_g$  and then slowly, remaining slightly less  
113 than 1. The abscissa in Fig. 2 shows the evolutionary "time"  $T_2$  as the total number of doublings  
114 corresponding active (not fixed) variable –  $N_g$  or  $n_g$  (chloroplasts reproduce by dividing in half).

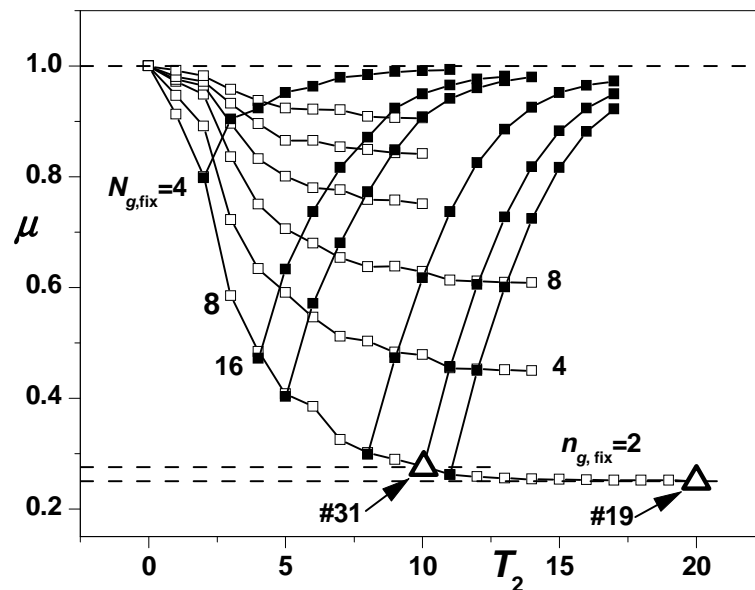

115

116 Fig. 2. Two-dimensional images of three-dimensional trajectories of dependencies  $\mu(N_g, n_g)$ . Examples of combined  
 117 trajectories: part  $n_{g,fix}$  at a fixed value  $n_g$  (empty squares) and part  $N_{g,fix}$  at a fixed  $N_g$  (filled squares),  $A = 0.005$ .  
 118 Empty triangles -  $\mu_{\#19}$  and  $\mu_{\#31}$  correspond to nature data [7] and their model interpretations [6] (see inset in Figure  
 119 1, #19).

120 Consider the possible trajectories of the endosymbiotic proto-plants in space  $(\mu, N_g, n_g)$ . It is evident  
 121 that the proto-plant begins as a series of infestations by solitary cyanobacterium into the host's body in  
 122 random places of an interval. It is evident that the proto-plant begins as a series of infestations by  
 123 solitary cyanobacterium into the host's body in random places of an interval. Since the reproduction of  
 124 it is not possible, then  $\mu = 1$  regardless of the number of points. When cyanobacterium gain an  
 125 opportunity of dividing with the restriction  $n_g \leq 2$ , and is removed the restriction (if it was) on the  
 126 number of groups  $N_g$ , evolution begins on a trajectory  $n_{g,fix} = 2$  (Fig. 2) going with decreasing to  $\mu$   
 127  $\approx 0.25$ . When at some moment  $T_2$  immediately or gradually in the course of evolution is removed the  
 128 restriction of division Cyanobacteria in groups, the evolution of proto-plant goes over to the  
 129 appropriate trajectory  $N_{g,fix}$  (Fig. 2), which leads to an increase in magnitude of  $\mu$  to the value of 1.  
 130 When fractal parameter  $\mu$  reaches 1 the situation is already corresponds to the sets of linear elements,  
 131 i.e., the piecewise linear or continuous filling of interval (considering the real size of the green  
 132 "point"). This assembly procedure is shown in Fig. 3 for multiple combinations of fixed values  $n_{g,fix}$   
 133 and  $N_{g,fix}$ . Thus, during the evolution of proto-plant the dependence  $\mu(T_2)$  of the fractal parameter must  
 134 go out from the 1, to pass through a minimum and then again tends to the value 1. In this picture,  
 135 obviously, profound detalization is possible, depending on symbiotic "experience" of protist and  
 136 cyanobacteria – for example, trajectory could start with  $n_{g,fix} = 4$ , as shown in Fig. 2, or depending on  
 137 value  $n_g$  of host, at which the trajectory type is changed, but it does not change the nature of the

138 trajectory of the proto-plant. It may be noted that it follows from this the countability of set of variants  
 139 of this evolution, which led every the proto-plant into state of a plant with  $\mu = 1$  in different  
 140 evolutionary times  $T_2$  and, consequently, could give different previous and / or subsequent histories of  
 141 plant evolution. In Fig. 2 positions at the trajectory  $n_{g,fix} = 2$ , corresponding to the values  $\mu$  (#19 and  
 142 #31) received for the two sets of natural values of  $t_{D,j}$  for spruce [7], are marked by asterisks. It is  
 143 evident that a proto-spruce (# 19) spent on the evolution approximately twice as much "time" than of  
 144 the proto-spruce (# 31), and this was reflected in their "descendants" [6, fig. 5].

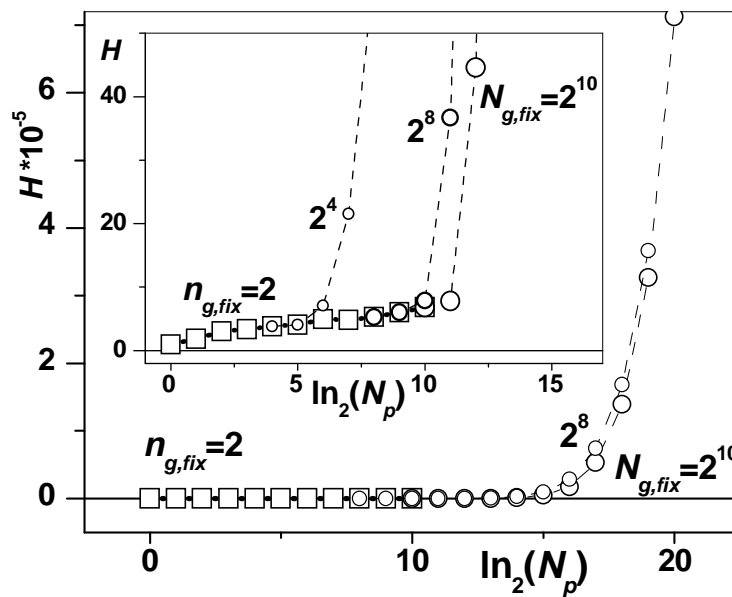

145  
 146 Fig. 3. The initial deceleration of the proto-plant growth during endosymbiosis. The dynamics of the size  $H \sim B^{1/\mu}$  of  
 147 system of green "points" corresponds to an increase in their biomass (population, unit of biomass – a mass of  
 148 cyanobacterium). Inset: movement along trajectories  $\mu(n_{g,fix}, N_{g,fix})$  with an increase in the number of groups of  $N_g$   
 149 in the first portion, where the number of  $n_{g,fix}$  points in the group (the squares) is fixed, and in the second portion  $N_{g,fix}$   
 150 (circles, dashed) – increasing total  $N_p = N_g * n_g$  by way doubling the number of "points"  $n_g$  in groups with using the  
 151 combined dynamics of the fractal parameter  $\mu(T_2)$  (see Figure 2.)

### 152 INITIAL GROWTH DECELERATION OF PROTO-PLANT

153 As seen from the foregoing, green biomass (i.e., the number of cyanobacteria involved in  
 154 endosymbiosis) is the leading variable in the evolution of proto-plant. Therefore, "turning over" the  
 155 ratio (1) and using the obtained dependence  $\mu(T_2)$ , we can calculate dynamics of the characteristic size  
 156  $H$  of the system of points  $\square H(T_2) \sim (N_g(T_2) * n_g(T_2))^{1/\mu(T_2)}$ . Fig. 3 shows examples of the dynamics of  
 157  $H(T_2)$  demonstrating a very weak growth at the stage  $n_{g,fix}$ , which is replaced by an exponential rise on  
 158 stage  $N_{g,fix}$ .

159  
 160

161 **DISCUSSION**

162 According to modern evolutionary theory (biogenetic law) "in embryonic development have  
163 sometimes can be reproduced stages of evolutionary history" [14], i.e., may be the so-called  
164 recapitulation, as which is usually understood a visually discernible similarity some stages of a modern  
165 organism in embryogenesis and ontogenesis of its evolutionary ancestors. In this sense apparently, the  
166 "punctiform recapitulations", which repeat visually sufficiently "strictly" the situation of occurrence of  
167 proto-plant (at the beginning of the range  $\mu < 1.0$  in Fig. 1), can be detected generally speaking in  
168 higher plants twice.

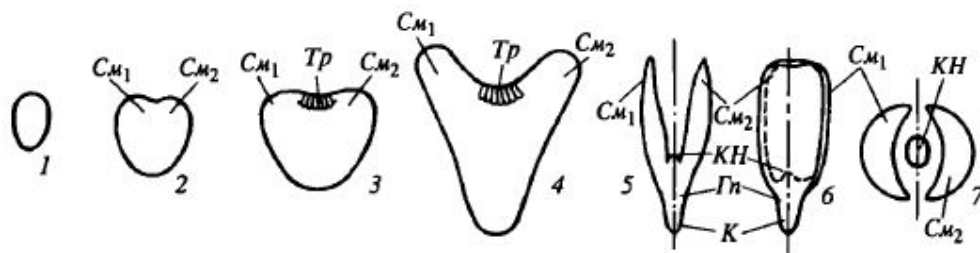

169  
170 Fig. 4. The scheme of development of dicotyledons embryos. 1-4 - the early development of the embryo; 5, 6 - fully  
171 formed embryo; view of two mutually perpendicular planes; 7 - a cross-section in the plumule embryos; CM1 and  
172 CM2 - cotyledons, TP - growth point (before forming cone of growth CN); Hp - hypocotyl; R - root. Dashed line  
173 shows the plane of symmetry (after [19: 144, Figure 70]).

174 The first time – in dicotyledons during embryogenesis when the seed embryo begins to turn green  
175 due to the transformation of the existing leucoplasts into the chloroplasts [18] in course of the  
176 transition from globular to heart phase of embryogenesis (Figure 4). [19]. The form (two cotyledons)  
177 of the embryo in a heart phase and placement of chlorophyll [20] may be associated with the  
178 appearance of "branches" of the first order in of proto-spruce (Fig. 1) with  $\mu \approx 0.25$ . Obviously, there is  
179 no complete coincidence and can not be. The matter is that the proto-plant appeared at initial absence  
180 of appropriate infrastructure and elements of the genome in the host, whereas a seed of higher plant in  
181 early embryogenesis it all in some form already has. Obviously, there is no complete coincidence and  
182 can not be. The matter is that the proto-plant appeared at initial absence of appropriate infrastructure  
183 and elements of the genome in the host, whereas a seed of higher plant in early embryogenesis it all in  
184 some form already has. According to the model, we can assume that the embryogenesis moves along a  
185 composit trajectory (of course, far more rapidly than a proto-plant has appeared), which is similar  
186 essentially to that shown in Fig. 3, taking into account the differences of their starting positions and  
187 structures. A distinctive feature of recapitulation, apparently, can be considered a group character of  
188 plastids placement with fixed number of  $n_{g,fix}$  in the group (Fig. 2, open squares) during the growth of  
189 the total number thereof on the globular phase of embryogenesis (Fig. 4 (1)) before and after the

190 transition to the heart-shaped phase. The result of the plant embryogenesis is the appearance of  
191 typically yellow, mature dry seeds, which have no active chlorophyll (chloroplasts when ripe are  
192 converted to colorless plastids - leucoplasts [18, 21]), and are able in this way to wait the appropriate  
193 conditions for germination.

194 The second time recapitulation can assume occurring during germination of mature dry, initially  
195 yellow seed of a plant when embryo with the formed cotyledons begins to turn green as a result of the  
196 transformation of existing colorless leucoplasts back in the green chloroplasts. Typically, this is a  
197 natural process of increasing the number of active chloroplasts which is expressed in normal ontogeny  
198 a plant. However for some economically important crops is observed, and it remains unclear [22] why  
199 the seeds, sometimes remaining green when ripe, i.e., during germination having an additional  
200 ("extra") chlorophyll, show poor germination, give low yields, and the poor quality of the product for  
201 oilseeds. If we assume that the situation at the beginning of seed germination and activation of  
202 "systemic" chlorophyll is reflected by the proto-plant model, then the role of "non-systemic" or excess  
203 chlorophyll become clear. It is obvious that the activation of chloroplast in the embryo, having the  
204 appropriate infrastructure is controlled by the genome. "Non-systemic" chloroplasts are not consistent  
205 with infrastructure of embryo, are located quite randomly and are generating extra, "non-systemic"  
206 oxygen that can damage cell structures [20, 23], i.e. adversely affect the process of germination and  
207 further ontogeny. In addition, not only the quantity but also the spatial distribution of the additional  
208 chloroplasts may be important as unacceptable for the existing infrastructure.

209 Thus formally in the ontogeny of the seed plants, there are two situations of recreating the  
210 photosynthetic system, which are similar at least morphologically at a model situation of emergence of  
211 proto-plant. In both uses the same elements that are in one of two states □ leucoplasts and  
212 chloroplasts, and presumably similar technologies switching them from one state to another. Evolution  
213 following the principle of "Occam's Razor" not produce superfluous entities.

214 Apparently, in connection with the presented model it would be advisable conducting experimental  
215 studies and model analysis of placement and transformation leucoplasts and chloroplasts in embryos  
216 and plantlets of wild and related mutants of *Arabidopsis* in the early embryogenesis and germination  
217 using fluorescence confocal microscopy [20].

## 218 REFERENCES

- 219 1. Galitskii V.V. Dynamics of the Distribution of Free-Growing Tree Biomass with Respect to  
220 Height: Model Analysis. *Doklady Biological Sciences*. 2006. V. 407. # 4. P. 166-168. doi:  
221 10.1134/S0012496606020153).



- 222 2. Galitskii V.V. The sectional structure of a tree. Model analysis of the vertical biomass  
223 distribution. *J. General Biology. (Zhurnal Obshchei Biologii)*. 2010. **71**(1): 19-29. (Russian).
- 224 3. Galitskii V.V. Model analysis of dynamics of the long-distance assimilates transport in the freely  
225 growing tree. *Math. Biol. and Bioinform.* 2009. **4**(1): 1-20. (Russian). URL:  
226 [http://www.matbio.org/downloads/Galitskii2009\(4\\_1\).pdf](http://www.matbio.org/downloads/Galitskii2009(4_1).pdf)
- 227 4. Galitskii V.V. Models of tree and trees' community dynamics: evolution from 2D to 3D models.  
228 *Math. Biol. and Bioinform.* 2012. **7**(1): 54-80. (Russian).  
229 [http://www.matbio.org/2012/Galitskii2012\(7\\_54\).pdf](http://www.matbio.org/2012/Galitskii2012(7_54).pdf)
- 230 5. Galitskii V.V. Sectional model of non-free tree growth. *Comp. Res. and Modelling*. 2016. **8**(2):  
231 307-322. (Russian). [http://crm.ics.org.ru/uploads/crmissues/crm\\_2016\\_2/16.08.09.pdf](http://crm.ics.org.ru/uploads/crmissues/crm_2016_2/16.08.09.pdf)
- 232 6. Galitskii V.V. Biomass Dynamics of Higher-Order Tree Branches: An Analysis of the Model.  
233 *Biol. Bull. Rev.* 2013. **3**(5): 412-421. doi: 10.1134/S2079086413050034
- 234 7. Tsel'niker Ju.L. The structure of spruce crown. *Russian forest science*. 1994. (4): 35-44.  
235 (Russian).
- 236 8. Kazimirov N.I. *Spruce forests of Karelia*. Leningrad: NAUKA Publ. 1971. 139 p.
- 237 9. Kramer P.J., Kozlowski T.T. *Physiology of trees*. NY: Academic Press. 1979.
- 238 10. Treskin P.P. Regularities of morphogenesis of the crown's skeletal part of mature tree. In:  
239 *Structure and productivity of spruce forests of south taiga*. Leningrad: NAUKA Publ. 1973.  
240 222-240. (Russian).
- 241 11. Feder J. *Fractals*. NY: PLENUM PRESS. 1988.
- 242 12. Galitskii V.V. Evolutionary trajectories in the parameter space of the sectional model of green  
243 spruce crown biomass. The emergence of a "proto-plant". *J. General Biology. (Zhurnal*  
244 *Obshchei Biologii)*. 2016. **77**(6): 409-422. (Russian).
- 245 13. Margulis L. *Symbiosis in Cell Evolution*. W.H. Freeman and Company. 1981. 77(6): 409-422.
- 246 14. Borisov N.M., Vorob'ev F.Ju., Gilarov A.M., Es'kov K.Ju., Zhuravlev A.Ju., Markov A.V.,  
247 Oskol'sky A.A., Petrov P.N., Shipunov A.B. *Evidencies of evolution*. Ed.: A.V. Markov. 2010.  
248 (Russian). <http://evolbiol.ru/evidence.htm>
- 249 15. Gamalei Ju.V. The nature of the trophic tract in vascular plants. *TSITOLOGIYA*. 2009. **51**(5):  
250 375-387. (Russian)

- 251 16. Hanson M.R., Kohler R.H. A Novel View of Chloroplast Structure. *Plant physiology online*.  
252 2006. <http://6e.plantphys.net/essay07.01.html>
- 253 17. Malachov V.V, Great symbiosis: origin of eukaryotic cell. *V mire nauki*. 2004. (2): 70-79.  
254 (Russian).
- 255 18. Zhukova G.Ja. *Embryo plastids of flowering plants*. Doct. Thesis. Spb.: 1992. (Russian).
- 256 19. Serebrjakova T.I., Voronin N.S., Elenevski A.G., Batygina T.B., Shorina R.I., Savinych N.P.  
257 *Botany with fundamentals phytocenology: Anatomy and morphology of plants*. 2006. 543 p.  
258 (Russian).
- 259 20. Tejos R.I., Mercado A.V., Meisel L.A. Analysis of chlorophyll fluorescence reveals stage specific  
260 patterns of chloroplast-containing cells during Arabidopsis embryogenesis. *Biol. Res*. 2010.  
261 **43**: 99-111. doi: 10.4067/S0716-97602010000100012.
- 262 21. Allorent G., Courtois F., Chevalier F., Lerbs-Mache S. Plastid gene expression during chloroplast  
263 differentiation and dedifferentiation into non-photosynthetic plastids during seed formation.  
264 *Plant Mol Biol*. 2013. **82**: 59-70. doi: 10.1007/s11103-013-0037-0.
- 265 22. Nakajima S., Ito H., Tanaka R., Tanaka A. Chlorophyll b Reductase Plays an Essential Role in  
266 Maturation and Storability of Arabidopsis Seeds. *Plant Physiology*. 2012. **160**: 261-273. doi:  
267 10.1104/pp.112.196881.
- 268 23. Smolikova G.N., Medvedev S.S. Photosynthesis in the seeds of chloroembryophytes. Russian  
269 *Plant Physiology*. 2016. **63**(1): 1-12. doi: 10.1134/S1021443715060163)
- 270
